# Supplementary material for: Effect of Different Host Plants on Life Type Characteristics of Three Spider Mite Pests (Acari: Prostigmata: Tetranychidae)
Source: MDPI journal article supplement (doi:10.3390/ani13223433), 2023-11-07
Supplement: s1 [file s1]

## **Effect of Different Host Plants on Life Type Characteristics of Three Spider Mite Pests (Acari: Prostigmata: Tetranychidae)**

Hafiz Muhammad Saqib Mushtaq, Hafiz Muhammad Sajid Ali, Muhammad Kamran and Fahad Jaber Alatawi \*

Department of Plant Protection, College of Food and Agriculture Sciences, King Saud University, P.O. Box 2460, Riyadh 11451, Saudi Arabia; hmushtaq@ksu.edu.sa (H.M.S.M.); hsajid@ksu.edu.sa (H.M.S.A.); murafique@ksu.edu.sa (M.K.)

\* Correspondence: falatawi@ksu.edu.sa

No. of supplementary tables: 1

**Table S1** Coding for statistical analysis of laboratory and field observations of life type characteristics

| Coding for tested spider mite species                   |                                  |                                    |                                                                  |                                                     |                                   |                                                   |
|---------------------------------------------------------|----------------------------------|------------------------------------|------------------------------------------------------------------|-----------------------------------------------------|-----------------------------------|---------------------------------------------------|
| <i>Tetranychus urticae</i>                              |                                  |                                    |                                                                  | 1                                                   |                                   |                                                   |
| <i>Eutetranychus orientalis</i>                         |                                  |                                    |                                                                  | 2                                                   |                                   |                                                   |
| <i>Eutetranychus palmatus</i>                           |                                  |                                    |                                                                  | 3                                                   |                                   |                                                   |
| Coding for tested host plants with <i>T. urticae</i>    |                                  |                                    |                                                                  |                                                     |                                   |                                                   |
| T1 ( <i>Solanum melongena</i> )                         |                                  |                                    |                                                                  | 1                                                   |                                   |                                                   |
| T2 ( <i>Capsicum annum</i> )                            |                                  |                                    |                                                                  | 2                                                   |                                   |                                                   |
| T3 ( <i>Zea mays</i> )                                  |                                  |                                    |                                                                  | 3                                                   |                                   |                                                   |
| T4 ( <i>Morus alba</i> )                                |                                  |                                    |                                                                  | 4                                                   |                                   |                                                   |
| T5 ( <i>Solanum lycopersicum</i> )                      |                                  |                                    |                                                                  | 5                                                   |                                   |                                                   |
| T6 ( <i>Ziziphus jujuba</i> )                           |                                  |                                    |                                                                  | 6                                                   |                                   |                                                   |
| Coding for tested host plants with <i>E. orientalis</i> |                                  |                                    |                                                                  |                                                     |                                   |                                                   |
| T1 ( <i>Ricinus communis</i> )                          |                                  |                                    |                                                                  | 1                                                   |                                   |                                                   |
| T2 ( <i>Citrus</i> sp.)                                 |                                  |                                    |                                                                  | 2                                                   |                                   |                                                   |
| T3 ( <i>Ziziphus jujuba</i> )                           |                                  |                                    |                                                                  | 3                                                   |                                   |                                                   |
| Coding for tested host plants with <i>E. palmatus</i>   |                                  |                                    |                                                                  |                                                     |                                   |                                                   |
| T1 ( <i>Phoenix dactylifera</i> )                       |                                  |                                    |                                                                  | 1                                                   |                                   |                                                   |
| T2 ( <i>Washingtonia filifera</i> )                     |                                  |                                    |                                                                  | 2                                                   |                                   |                                                   |
| Coding for life type characteristics                    |                                  |                                    |                                                                  |                                                     |                                   |                                                   |
| Host plant type (HP)                                    | 1<br>(Broad-leaved<br>deciduous) | 2<br>(Broad-leaved<br>evergreen)   | 3<br>(Narrow-leaved<br>deciduous)                                | 4<br>(Narrow-leaved<br>evergreen)                   | 5<br>(Broad leaved<br>annual)     | 6<br>(Narrow leaved<br>annual)                    |
| Leaf side inhabited (LS)                                | 1<br>(Upper)                     | 2<br>(Under)                       | 3<br>(Both)                                                      |                                                     |                                   |                                                   |
| Webbing structure (WS)                                  | 1<br>(Little web, LW)            | 2<br>(Complicated<br>web, CW)      | 3<br>(Woven nest, WN)                                            |                                                     |                                   |                                                   |
| Site for quiescence (SQ)                                | 1<br>(On/within web<br>threads)  | 2<br>(On leaf<br>surface)          | 3<br>(Both on/within<br>web threads & on<br>leaf surface)        | 4<br>(Both on/within<br>web threads &<br>trichrome) | 5<br>(On trichrome)               | 6<br>(Both on/within<br>web, trichrome &<br>leaf) |
| Site for oviposition (SO)                               | 1<br>(On/within web<br>threads)  | 2<br>(On leaf<br>surface)          | 3<br>(Both on/within<br>web threads & on<br>leaf surface)        | 4<br>(Both on/within<br>web threads &<br>trichrome) | 5<br>(On trichrome)               | 6<br>(Both on/within<br>web, trichrome &<br>leaf) |
| Site for defecation (SD)                                | 1<br>(On/within web<br>threads)  | 2<br>(On leaf<br>surface)          | 3<br>(Both on/within<br>web threads & on<br>leaf surface)        | 4<br>(Both on/within<br>web threads &<br>trichrome) | 5<br>(On trichrome)               | 6<br>(Both on/within<br>web, trichrome &<br>leaf) |
| Egg covers produced (EC)                                | 1<br>(Egg covers present)        | 2<br>(Egg covers<br>absent)        | 3 (some eggs<br>with/without web<br>covers)                      |                                                     |                                   |                                                   |
| Site for feeding & walking (SFW)                        | 1<br>(On, in & under the<br>web) | 2<br>(Openly away<br>from the web) | 3<br>(Both on, in and<br>under & openly<br>away from the<br>web) |                                                     |                                   |                                                   |
| Spinning during walking (SW)                            | 1 (without)                      | 2 (with)                           |                                                                  |                                                     |                                   |                                                   |
| Webbing density (WD)                                    | 1<br>(0%; no)                    | 2<br>(1-25%; low)                  | 3 (26-50%;<br>medium)                                            | 4 (51-75%; high)                                    | 5 (76-100%;<br>extremely<br>high) |                                                   |
